# Supplementary material for: Electrochemical oxidation of 2-propanol over platinum and palladium electrodes in alkaline media studied by in situ attenuated total reflection infrared spectroscopy
Source: Royal Society of Chemistry journal article supplement (doi:10.1039/c5cp07518a), 2016-01-01
Supplement: c5cp07518a1.pdf [file c5cp07518a1.pdf]

Electronic Supplementary information

Fig. S1 (T. Okanishi et al.)

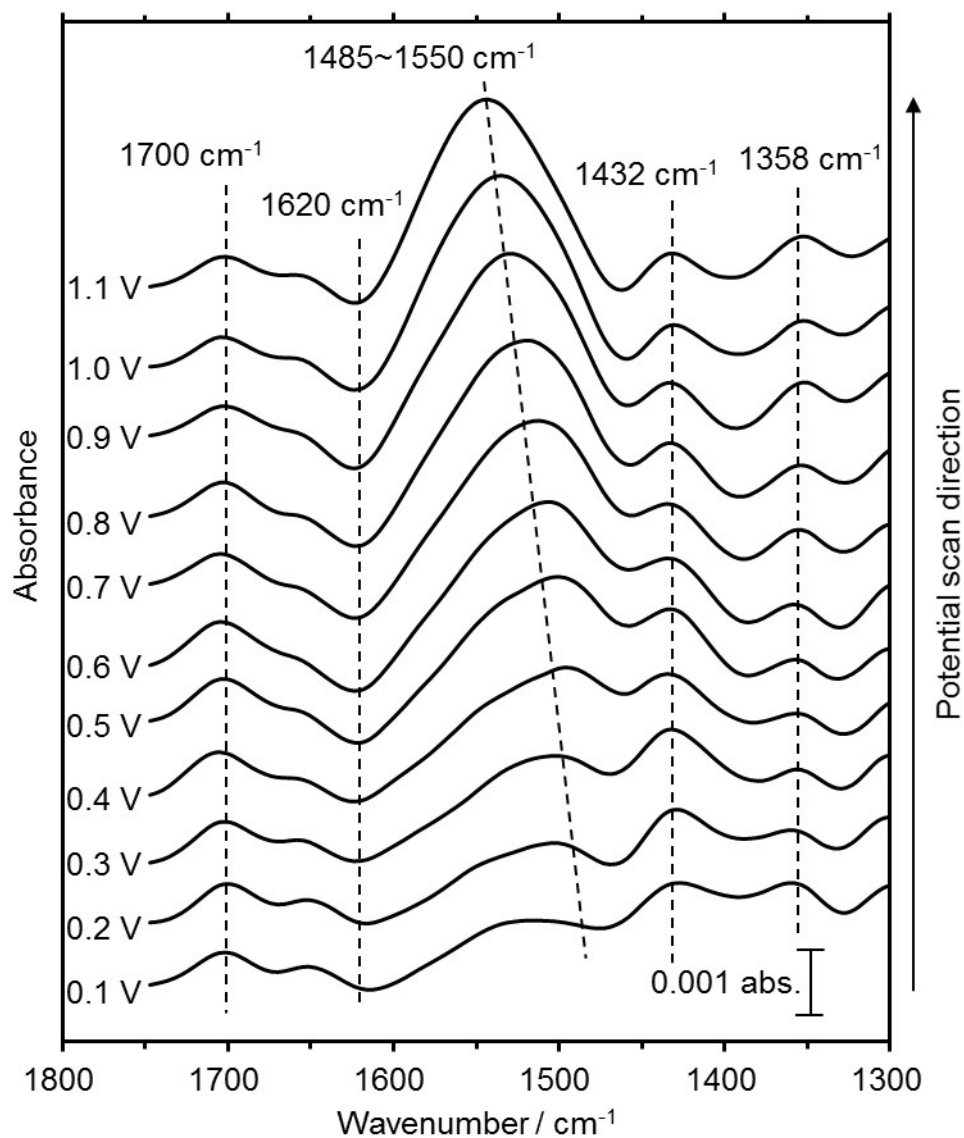

Fig. S1. Time-resolved IR spectra of the Pt surface acquired simultaneously with the linear sweep voltammograms in 0.25 M KOH solution with 1 M  $^{13}\text{C}$  acetone.
